# Supplementary material for: Bio-cleaning improves the mechanical properties of lignin-based carbon fibers
Source: Royal Society of Chemistry journal article supplement (doi:10.1039/d0ra03412f), 2020-01-01
Supplement: d0ra03412f1.pdf [file d0ra03412f1.pdf]

## Supporting Information

For

### Bio-cleaning improves mechanical properties of lignin-based carbon fibers

Tanushree Ghosh, Jiawei Chen, Tian Tang, Cagri Ayranci\*

<sup>1</sup>Department of Mechanical Engineering, University of Alberta, 116 St & 85 Ave, Edmonton, Alberta, Canada.

\* Corresponding authors:

+01 780 492 5467, email: [tian.tang@ualberta.ca](mailto:tian.tang@ualberta.ca) (Tian Tang)

+01 780 492 2791, email: [cayranci@ualberta.ca](mailto:cayranci@ualberta.ca) (Cagri Ayranci)

#### Contents:

Figure S-1: Tensile Sample

Table S-1: Average fiber diameters and mechanical properties of electrospun lignin fibers at 22 wt% total solid concentration (n=10).

Table S-2: Average fiber diameters and mechanical properties of electrospun lignin fibers at 30 wt% total solid concentration (n=10).

Table S-3: Average fiber diameters and mechanical properties of electrospun lignin fibers at 35 wt% total solid concentration (n=10).

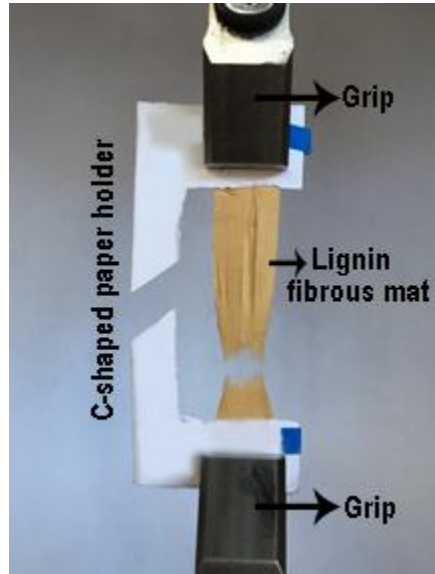

Figure S-1. Tensile Sample

Table S-1. Average fiber diameters and mechanical properties of electrospun lignin fibers at 22 wt% total solid concentration (n=10)

| PEO MW (kDa) | Lignin /PEO | Electric Field (kV/m) | Spinning Behavior | Fiber Morphology                  | Fiber Diameter (nm) | Elastic Modulus (MPa) | Tensile Strength (MPa) | Strain at Failure (%) |
|--------------|-------------|-----------------------|-------------------|-----------------------------------|---------------------|-----------------------|------------------------|-----------------------|
| 1000         | 95/5        | 50                    | Uniform           | Bead-free, no fusion              | 1000.48±97.48       | 229.79±69.21          | 2.08±0.80              | 15.39±7.20            |
|              |             | 60                    | Uniform           | Bead-free, no fusion              | 863.47±113.14       | 226.83±67.16          | 2.29±0.46              | 21.99±7.90            |
|              |             | 70                    | Spitting          | Bead-free, no fusion              | 749.85±102.64       | 111.30±38.79          | 1.26±0.46              | 12.33±3.64            |
|              | 96/4        | 50                    | Uniform           | Bead-free, no fusion              | 924.51±103.30       | 177.87±49.64          | 2.12±0.35              | 14.77±5.58            |
|              |             | 60                    | Uniform           | Bead-free, no fusion              | 840.95±102.26       | 182.08±52.73          | 2.29±0.34              | 13.49±4.34            |
|              |             | 70                    | Spitting          | Bead-free, no fusion              | 669.59±87.69        | 87.11±31.71           | 1.59±0.64              | 9.48±2.60             |
|              | 97/3        | 50                    | Uniform           | Bead-free, no fusion              | 721.45±89.28        | 201.56±55.27          | 2.43±0.67              | 10.77±4.37            |
|              |             | 60                    | Uniform           | BOAS, no fusion                   | 718.09±91.25        | 194.59±65.85          | 2.54±0.80              | 9.22±2.15             |
|              |             | 70                    | Uniform           | bead-free, no fusion              | 543.86±103.58       | 121.64±36.70          | 1.64±0.46              | 9.50±1.75             |
| 2000         | 95/5        | 50                    | Uniform           | BOAS, no fusion                   | 714.36±103.65       | 167.53±45.82          | 2.10±0.70              | 14.28±4.87            |
|              |             | 60                    | Uniform           | Occasional beads, no fusion       | 741.10±102.90       | 175.11±56.61          | 2.16±0.62              | 14.56±5.13            |
|              |             | 70                    | Uniform           | Occasional beads, no fusion       | 699.23±90.10        | 173.62±58.62          | 1.79±0.26              | 13.96±5.68            |
|              | 96/4        | 50                    | Uniform           | Bead-free, no fusion              | 995.82±104.04       | 192.75±63.11          | 2.21±0.62              | 15.87±6.59            |
|              |             | 60                    | Spitting          | Bead-free, no fusion              | 901.54±115.58       | 124.26±38.84          | 1.40±0.37              | 13.67±2.53            |
|              |             | 70                    | Spitting          | Occasional bead, lumps, no fusion | 569.31±88.18        | 229.35±60.42          | 3.66±0.74              | 13.92±4.89            |
|              | 97/3        | 50                    | Uniform           | Bead-free, no fusion              | 1032.47±140.37      | 110.71±28.98          | 1.47±0.40              | 20.09±6.36            |

|      |      |    |          |                                  |               |              |           |            |
|------|------|----|----------|----------------------------------|---------------|--------------|-----------|------------|
|      |      | 60 | Uniform  | Mostly bead-free, some fusion    | 961.74±183.26 | 93.02±25.90  | 1.27±0.35 | 13.82±3.23 |
|      |      | 70 | Spitting | Bead-free fiber, no fusion       | 778.89±82.65  | 112.21±40.73 | 1.60±0.47 | 13.40±4.34 |
| 5000 | 95/5 | 50 | Uniform  | Bead-free fiber, no fusion       | 722.42±93.92  | 130.88±35.53 | 2.26±0.40 | 14.71±3.87 |
|      |      | 60 | Uniform  | Bead-free fiber, no fusion       | 710.23±85.50  | 172.32±46.88 | 2.70±0.85 | 15.42±6.89 |
|      |      | 70 | Uniform  | BOAS, no fusion                  | 584.93±99.34  | 139.66±24.80 | 2.31±0.45 | 12.04±0.47 |
|      | 96/4 | 50 | Uniform  | Bead-free fiber, no fusion       | 829.21±122.11 | 170.16±51.54 | 2.01±0.56 | 12.90±8.13 |
|      |      | 60 | Uniform  | Bead-free fiber, a little fusion | 801.68±180.02 | 170.93±62.89 | 2.04±0.52 | 19.23±6.31 |
|      |      | 70 | Uniform  | BOAS, a little fusion            | 665.41±89.13  | 100.83±72.84 | 1.11±0.46 | 18.36±6.46 |
|      | 97/3 | 50 | Uniform  | Bead-free fiber, no fusion       | 971.57±118.03 | 155.77±38.86 | 2.51±0.68 | 19.34±6.72 |
|      |      | 60 | Spitting | Bead-free fiber, fusion          | 880.11±97.29  | 76.53±26.75  | 0.84±0.29 | 8.79±2.61  |
|      |      | 70 | Spitting | Mostly bead-free, some fusion    | 867.48±121.11 | 72.30±25.80  | 1.12±0.30 | 10.95±3.80 |

Table S-2. Average fiber diameters and mechanical properties of electrospun lignin fibers at 30 wt% total solid concentration (n=10).

| PEO MW (kDa) | Lignin /PEO | Electric Field (kV/m) | Diameter (nm)  | Morphology                          | Observations | Tensile Strength (MPa) | Elastic Modulus (MPa) | Strain at Failure (%) |
|--------------|-------------|-----------------------|----------------|-------------------------------------|--------------|------------------------|-----------------------|-----------------------|
| 1000         | 99.5/0.5    | 50                    | 1327.31±217.78 | Bead-free, no fusion, little ribbon | Uniform      | 1.63±0.47              | 185.73±33.91          | 24.13±2.93            |
|              |             | 60                    | 1335.10±251.83 | Bead-free, no fusion, little ribbon | Uniform      | 1.64±0.31              | 245.54±78.52          | 15.26±6.44            |
|              |             | 70                    | 1190.89±219.95 | Bead-free, no fusion, little ribbon | Uniform      | 1.74±0.74              | 258.91±97.89          | 15.74±3.80            |
|              | 99.75/0.25  | 50                    | 1334.81±229.69 | Bead-free, no fusion, little ribbon | Uniform      | 1.35±0.17              | 91.46±33.34           | 30.17±4.46            |
|              |             | 60                    | 1276.09±192.62 | Bead-free, no fusion, little ribbon | Uniform      | 1.44±0.58              | 99.76±36.01           | 26.94±6.45            |
|              |             | 70                    | 1202.89±194.93 | Bead-free, no fusion, little ribbon | Uniform      | 2.19±0.63              | 237.95±100.88         | 24.30±5.10            |

Table S-3. Average fiber diameters and mechanical properties of electrospun lignin fibers at 35 wt% total solid concentration (n=10).

| PEO Mv (kDa) | PEO/KL A   | Electric Field (kV/m) | Diameter (nm)      | Morphology                          | Observations | Tensile Strength (MPa) | Elastic Modulus (MPa) | Strain at Failure (%) |
|--------------|------------|-----------------------|--------------------|-------------------------------------|--------------|------------------------|-----------------------|-----------------------|
| 1000         | 0.5/99.5   | 50                    | 1901.02±391.1<br>1 | Bead-free, no fusion, ribbon-like   | Uniform      | 1.59±0.53              | 235.41±79.13          | 18.46±7.89            |
|              |            | 60                    | 1842.56±332.2<br>5 | Bead-free, no fusion, ribbon-like   | Uniform      | 0.77±0.39              | 142.45±59.85          | 9.56±2.59             |
|              |            | 70                    | 1787.68±349.8<br>3 | Bead-free, no fusion, ribbon-like   | Uniform      | 0.42±0.17              | 97.49±47.26           | 8.70±1.91             |
|              | 0.25/99.75 | 50                    | 1573.16±276.8<br>1 | Bead-free, no fusion, little ribbon | Uniform      | 1.89±0.21              | 235.83±38.85          | >40                   |
|              |            | 60                    | 1360.58±238.6<br>3 | Bead-free, no fusion, little ribbon | Uniform      | 1.97±0.48              | 241.88±75.97          | >40                   |
|              |            | 70                    | 1250.26±203.2<br>2 | Bead-free, no fusion, little ribbon | Uniform      | 2.05±0.86              | 177.45±66.98          | 26.06±6.27            |
|              | 0.1/99.9   | 50                    | 1520.30±219.5<br>9 | Bead-free, no fusion, little ribbon | Uniform      | 1.74±0.36              | 185.79±53.65          | >40                   |
|              |            | 60                    | 1397.83±225.3<br>8 | Bead-free, no fusion, little ribbon | Uniform      | 1.67±0.46              | 202.94±67.28          | 23.58±6.05            |
|              |            | 70                    | 1286.65±182.0<br>0 | Bead-free, no fusion, little ribbon | Uniform      | 1.80±0.54              | 203.57±48.77          | 23.03±5.41            |
| 5000         | 0.1/99.9   | 50                    | 1847.05±431.7<br>5 | Bead-free, no fusion, little ribbon | Uniform      | 1.32±0.50              | 189.45±73.18          | 11.46±5.59            |
|              |            | 60                    | 1823.86±392.4<br>0 | Bead-free, no fusion, little ribbon | Uniform      | 1.96±0.62              | 282.88±121.88         | 15.20±3.66            |
|              |            | 70                    | 1613.91±394.9<br>6 | Bead-free, no fusion, little ribbon | Uniform      | 1.60±0.77              | 296.38±156.73         | 9.15±2.49             |
